# Supplementary material for: Micro RNA clusters in maternal plasma are associated with preterm birth and infant outcomes
Source: PLoS One. 2018 Jun 27;13(6):e0199029. doi: 10.1371/journal.pone.0199029 (PMC6021076; doi:10.1371/journal.pone.0199029)
Supplement: S2 Table — (XLSX) [file pone.0199029.s003.xlsx]

## Sheet: Sheet1
				Factor Name
miRNA	Expression Rank	Chromosome	Cluster	c14mc	c19mc	miR-17/92
hsa.miR.20a.5p	1	13	miR-17/92			0.81
hsa.miR.19a.3p	2	13	miR-17/92			0.79
hsa.miR.18a.5p	4	13	miR-17/92			0.84
hsa.miR.17.5p	9	13	miR-17/92		-0.27	0.64
hsa.miR.18a.3p	21	13	miR-17/92			0.29
hsa.miR.17.3p	23	13	miR-17/92			0.62
hsa.miR.376a.3p	6	14	c14mc	0.88
hsa.miR.376c.3p	8	14	c14mc	0.88
hsa.miR.409.3p	10	14	c14mc	0.79
hsa.miR.136.5p	12	14	c14mc-rtl	0.65		0.2
hsa.miR.136.3p	13	14	c14mc-rtl	0.97
hsa.miR.495.3p	14	14	c14mc	0.79		0.26
hsa.miR.134.5p	15	14	c14mc	0.8
hsa.miR.376b.3p	16	14	c14mc	0.83
hsa.miR.337.3p	17	14	c14mc-rtl	0.83
hsa.miR.369.3p	18	14	c14mc	0.86
hsa.miR.543	19	14	c14mc	0.9		0
hsa.miR.410.3p	20	14	c14mc	0.94
hsa.miR.329.3p	24	14	c14mc	0.72
hsa.miR.377.3p	26	14	c14mc	0.77	0.2	0.22
hsa.miR.379.5p	28	14	c14mc	0.4
hsa.miR.431.5p	29	14	c14mc-rtl	0.8
hsa.miR.654.3p	30	14	c14mc	0.75
hsa.miR.127.3p	31	14	c14mc-rtl	0.67
hsa.miR.432.5p	32	14	c14mc-rtl	0.62		0.25
hsa.miR.323a.3p	33	14	c14mc	1		-0.33
hsa.miR.381.3p	35	14	c14mc	0.71
hsa.miR.487b.3p	36	14	c14mc	0.68	0.21	0.2
hsa.miR.496	37	14	c14mc	0.82		-0.21
hsa.miR.889.3p	38	14	c14mc	0.6	-0.2
hsa.miR.376a.5p	39	14	c14mc	0.45
hsa.miR.337.5p	40	14	c14mc-rtl	0.89
hsa.miR.382.3p	42	14	c14mc	0.42	0.23
hsa.miR.369.5p	43	14	c14mc	0.81	-0.3	-0.41
hsa.miR.493.5p	44	14	c14mc-rtl	0.26		0.34
hsa.miR.433.3p	48	14	c14mc-rtl	0.71	0.22
hsa.miR.379.3p	54	14	c14mc	0.57	0.32
hsa.miR.494.3p	55	14	c14mc	0.24		0.47
hsa.miR.380.3p	57	14	c14mc	0.64	-0.23
hsa.miR.517a.3p	11	19	c19mc		0.97
hsa.miR.518f.5p	22	19	c19mc		0.79
hsa.miR.525.5p	25	19	c19mc		0.86
hsa.miR.524.5p	34	19	c19mc	0.2	0.52	-0.34
hsa.miR.519a.3p	41	19	c19mc		0.75
hsa.miR.519d.3p	45	19	c19mc	-0.25	0.21
hsa.miR.515.3p	46	19	c19mc		0.76
hsa.miR.515.5p	47	19	c19mc		0.49
hsa.miR.524.3p	49	19	c19mc		0.68
hsa.miR.520a.5p	50	19	c19mc		0.74
hsa.miR.518c.3p	51	19	c19mc	-0.28	0.4
hsa.miR.518d.5p	52	19	c19mc		0.58
hsa.miR.518c.5p	53	19	c19mc		0.6
hsa.miR.520c.3p	56	19	c19mc		0.53
hsa.miR.106a.5p	3	X	miR-17/92		-0.18	0.79
hsa.miR.18b.5p	5	X	miR-17/92			0.83
hsa.miR.363.3p	7	X	miR-17/92	-0.21		0.62
hsa.miR.20b.5p	27	X	miR-17/92	-0.2		0.59
*Factor loading scores < 0.2 are supressed.
